# Supplementary material for: The effects of increased dose of exercise-based therapies to enhance motor recovery after stroke: a systematic review and meta-analysis
Source: Springer Nature journal article supplement (doi:10.1186/1741-7015-8-60), 2010-10-13
Supplement: 12916_2010_319_MOESM1_ESM.pdf [file 12916_2010_319_MOESM1_ESM.pdf]

Records after duplicates removed  
(n = 940 )

Records screened  
(n = 940)

Records excluded  
(n = 909 )

Full-text articles assessed  
for eligibility  
(n = 31 )

Full-text articles excluded,  
with reasons  
(n = 22 )

Studies included in  
qualitative synthesis  
(n = 7 )

Studies included in  
quantitative synthesis  
(meta-analysis)  
(n = 7)
